# Supplementary material for: Bisphenol A (BPA) Directly Activates the G Protein-Coupled Estrogen Receptor 1 and Triggers the Metabolic Disruption in the Gonadal Tissue of Apostichopus japonicus
Source: MDPI journal article supplement (doi:10.3390/biology12060798), 2023-05-31
Supplement: s1 [file s1]

# Bisphenol A (BPA) directly activates the G protein-coupled estrogen receptor 1 and triggers the metabolic disruption in the gonadal tissue of *Apostichopus japonicus*

Jieyi Yuan<sup>1,†</sup>, Jingwen Yang<sup>1,†</sup>, Xiuwen Xu<sup>1</sup>, Zexianghua Wang<sup>1</sup>, Zhijing Jiang<sup>1</sup>, Zhiqing Ye<sup>1</sup>, Yucheng Ren<sup>1</sup>, Qing Wang<sup>2,\*</sup>, Tianming Wang<sup>1,\*</sup>

\* Correspondence: Tianming Wang: wangtianming@zjou.edu.cn; Qing Wang: qingwang@yic.ac.cn

**Table S1.** GenBank accession numbers corresponding to the sequence used for phylogenetic tree analysis and multiple sequence alignment.

| Gene type                             | abbreviation   | GenBank accession numbers |
|---------------------------------------|----------------|---------------------------|
| Estrogen receptor $\alpha$            | HsER $\alpha$  | NP_000116.2               |
|                                       | MmER $\alpha$  | NP_001289460              |
|                                       | CfER $\alpha$  | XP_533454                 |
|                                       | SsER $\alpha$  | NP_999385.1               |
|                                       | GgER $\alpha$  | NP_990514.1               |
|                                       | DrER $\alpha$  | NP_694491.1               |
|                                       | CaER $\alpha$  | XP_026089164.1            |
|                                       | XlER $\alpha$  | NP_001083085              |
|                                       | BmER $\alpha$  | XP_014332422              |
|                                       | LcoER $\alpha$ | NP_001290305              |
|                                       | LcfER $\alpha$ | XP_018528117              |
|                                       | HcER $\alpha$  | XP_019750588              |
|                                       | CsER $\alpha$  | XP_008310919              |
|                                       | OsER $\alpha$  | XP_029644783              |
|                                       | LaER $\alpha$  | XP_013404576              |
|                                       | OgER $\alpha$  | XP_046148097              |
|                                       | MaER $\alpha$  | XP_020443618              |
|                                       | CmER $\alpha$  | XP_007892594              |
| Estrogen receptor $\beta$             | HsER $\beta$   | NP_001428                 |
|                                       | MmER $\beta$   | NP_034287                 |
|                                       | CfER $\beta$   | XP_038445068              |
|                                       | SsER $\beta$   | NP_001001533              |
|                                       | GgER $\beta$   | NP_990125                 |
|                                       | DrER $\beta$   | NP_777287                 |
|                                       | CaER $\beta$   | XP_026079489              |
|                                       | XlER $\beta$   | NP_001124426              |
|                                       | BmER $\beta$   | XP_005898314              |
|                                       | LcmER $\beta$  | XP_005986456              |
|                                       | LcoER $\beta$  | XP_010737659              |
|                                       | LcfER $\beta$  | XP_018538032              |
|                                       | HcER $\beta$   | XP_019726315              |
|                                       | CsER $\beta$   | NP_001281164              |
|                                       | OgER $\beta$   | XP_046147746              |
|                                       | MaER $\beta$   | XP_020459576              |
|                                       | RtER $\beta$   | XP_020380159              |
| G protein-coupled estrogen receptor 1 | HsGPER1        | NP_001035055              |
|                                       | MmGPER1        | NP_084047                 |

|                      |                  |              |
|----------------------|------------------|--------------|
|                      | CfGPER1          | XP_005621261 |
|                      | SsGPER1          | XP_003124292 |
|                      | GgGPER1          | NP_001155877 |
|                      | DrGPER1          | NP_001122195 |
|                      | CaGPER1          | XP_026056231 |
|                      | XIGPER1          | XP_018091862 |
|                      | BmGPER1          | XP_014338621 |
|                      | LcmGPER1         | XP_006010235 |
|                      | LcoGPER1/LcGPER1 | XP_010728847 |
|                      | LcfGPER1         | XP_018537294 |
|                      | HcGPER1          | XP_019731372 |
|                      | CsGPER1          | XP_008312438 |
|                      | OgGPER1          | XP_046163069 |
|                      | MaGPER1          | XP_020466193 |
|                      | CmGPER1          | XP_007901691 |
| Kisspeptin1 receptor | HsKISS1R         | NP_115940    |
|                      | MmKISS1R         | NP_444474    |
|                      | SsKISS1R         | NP_001038089 |
|                      | DrKISS1R         | NP_001099149 |
|                      | CaKISS1R         | XP_026051331 |
|                      | XIKISS1R         | XP_018080755 |
|                      | LcoKISS1R        | XP_010727548 |
|                      | LcfKISS1R        | XP_018528723 |
|                      | HcKISS1R         | XP_019739218 |
|                      | CsKISS1R         | XP_008332638 |
|                      | OgKISS1R         | XP_046178411 |
|                      | CmKISS1R         | XP_007898035 |

Table S2. The primers used in the experiments

| Primer             | Sequence                  |
|--------------------|---------------------------|
| <i>AjGPER1-F</i>   | CTTCAACACAGTTCTTCTGTCAAGA |
| <i>AjGPER1-R</i>   | TGTCGACCTGTATAATCTCGTCAT  |
| <i>q-AjGPER1-F</i> | GTCGTAGCGACTGTCCATATAGTT  |
| <i>q-AjGPER1-R</i> | CATCTTGCCTGTTCTGATACTGACT |
| <i>β-tublin-F</i>  | CACCACGTGGACTCAAAATG      |
| <i>β-tublin-R</i>  | GAAAGCCTTACGACGGAACA      |

Table S3. Multiple sequence alignment

| abbreviation | % identity | alignment length | E value              |
|--------------|------------|------------------|----------------------|
| AjGPER1      | 100.000    | 398              | 0.0                  |
| HsGPER1      | 27.891     | 294              | 1.59e <sup>-26</sup> |
| GgGPER1      | 26.074     | 326              | 5.48e <sup>-24</sup> |
| MmGPER1      | 25.965     | 285              | 1.59e <sup>-23</sup> |
| DrGPER1      | 28.045     | 353              | 2.20e <sup>-23</sup> |
| XIGPER1      | 28.472     | 288              | 1.31e <sup>-22</sup> |
| HcGPER1      | 27.445     | 317              | 1.94e <sup>-20</sup> |
| MaGPER1      | 28.615     | 325              | 3.99e <sup>-20</sup> |
| LcGPER1      | 27.066     | 351              | 6.07e <sup>-20</sup> |
| CmGPER1      | 25.402     | 311              | 6.26e <sup>-19</sup> |

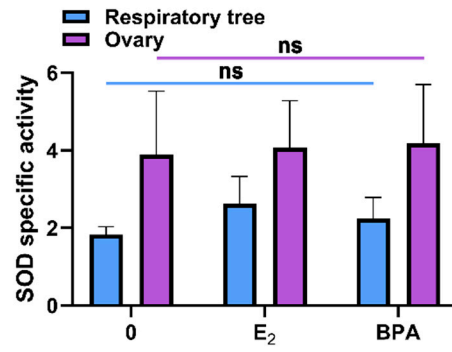

**Figure S1.** Effects of 4 h exposure to E<sub>2</sub> or BPA on SOD enzyme activity in the respiratory tree and ovary tissue of *A. japonicus*. Values shown are multiples of the lowest activity of the control group expressed as means  $\pm$  SEM (n = 3). The bars of different colors represent different tissues. Data were analyzed by using one-way ANOVA followed by Tukey's multiple comparison tests (ns  $P > 0.05$ ).
