# Supplementary material for: Bisphenol A (BPA) Directly Activates the G Protein-Coupled Estrogen Receptor 1 and Triggers the Metabolic Disruption in the Gonadal Tissue of Apostichopus japonicus
Source: MDPI journal article supplement (doi:10.3390/biology12060798), 2023-05-31
Supplement: s1 [file s1]

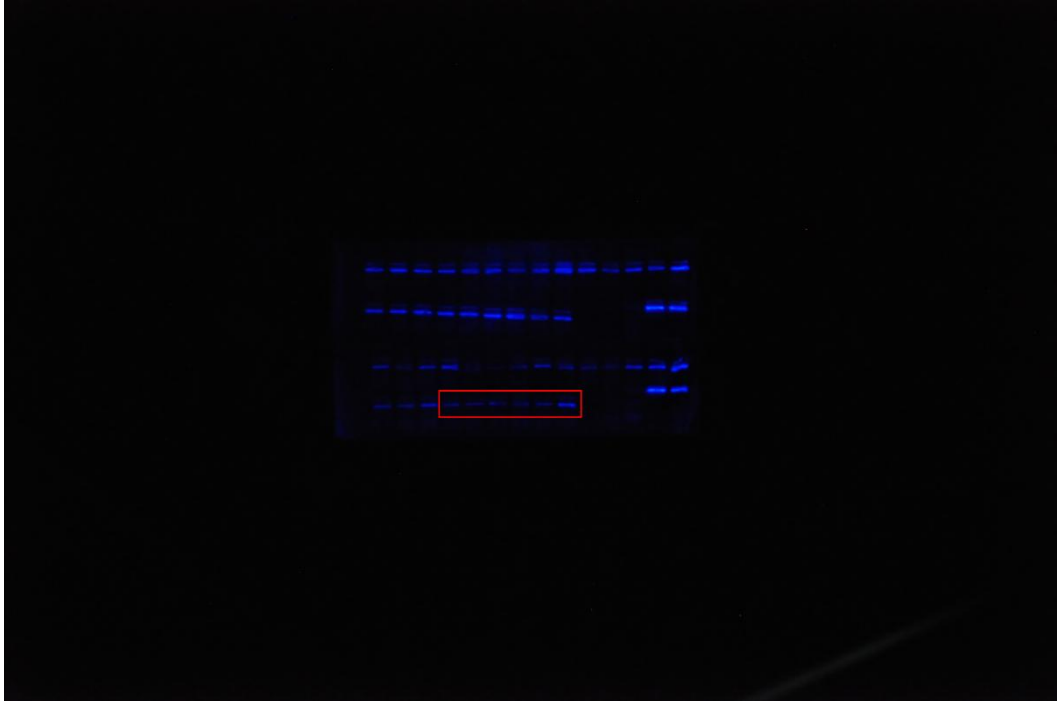

**Figure S2.** In the red box, from left to right, the phosphorylated ERK1/2 of blank (untransfected) cells, control (transfected with empty vector pEGFP-N1) cells, and AjGPER1-EGFP expressing cells treated with DMSO or E<sub>2</sub> (100 nM) for 10 min, respectively. Corresponding to Figure 5A in the manuscript.

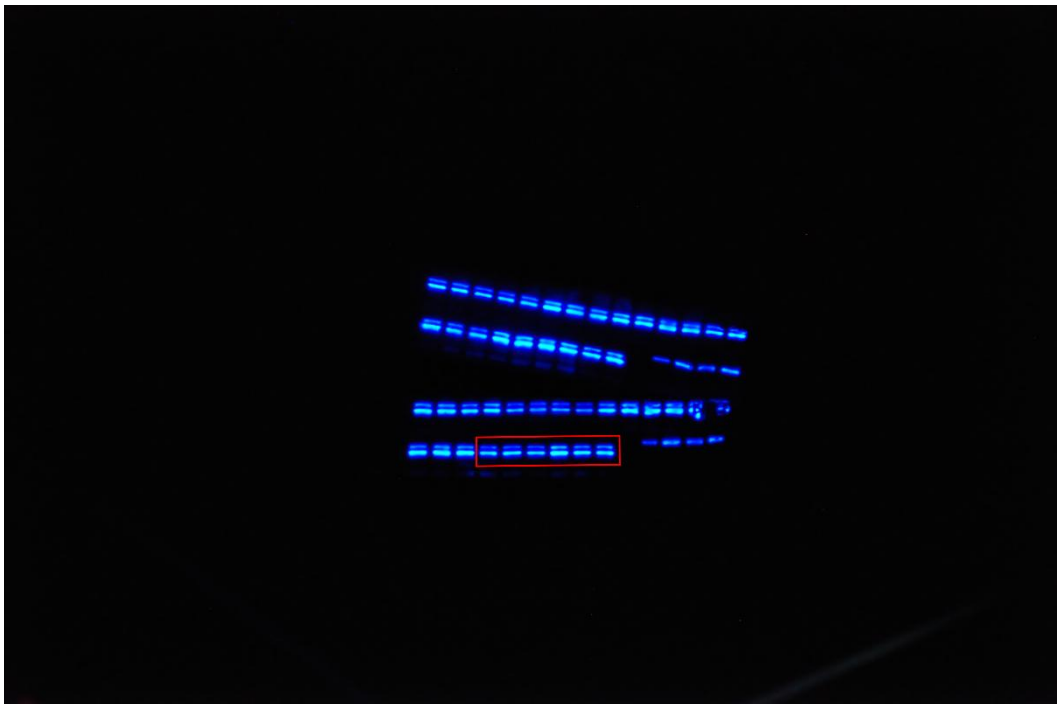

**Figure S3.** In the red box, from left to right, the total ERK1/2 of blank (untransfected) cells, control (transfected with empty vector pEGFP-N1) cells, and AjGPER1-EGFP expressing cells treated with DMSO or E<sub>2</sub> (100 nM) for 10 min, respectively. Corresponding to Figure 5A in the manuscript.

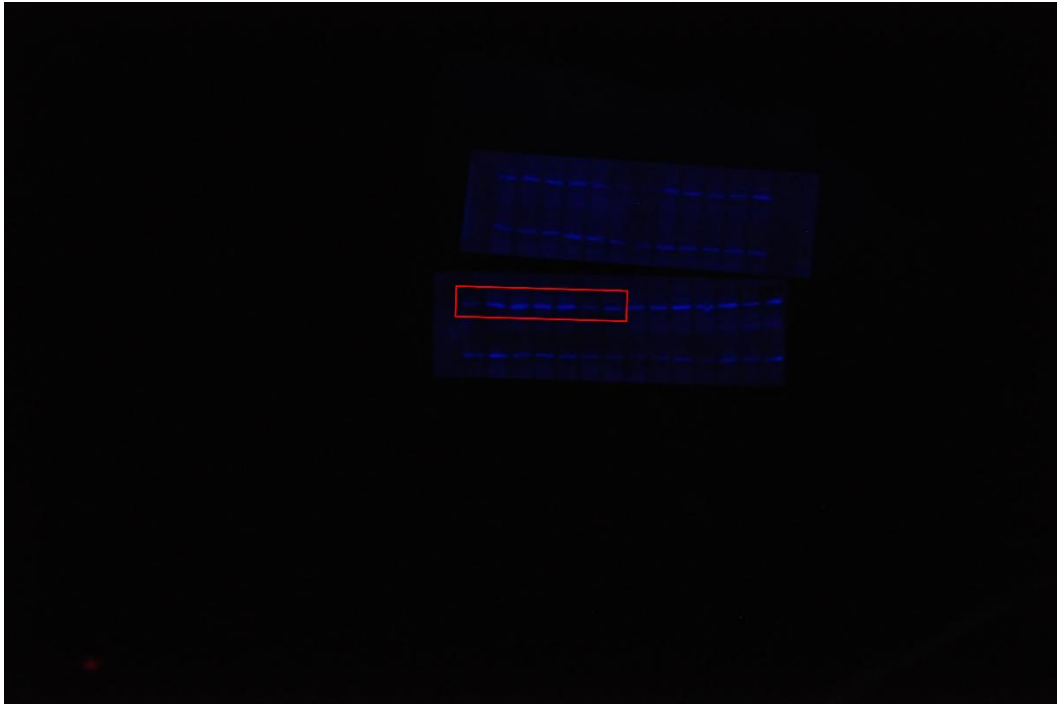

**Figure S4.** In the red box, from left to right, time course of E<sub>2</sub> (100 nM) treatment induced ERK1/2 phosphorylation in AjGPER1-EGFP-expressing cells. Corresponding to Figure 5B in the manuscript.

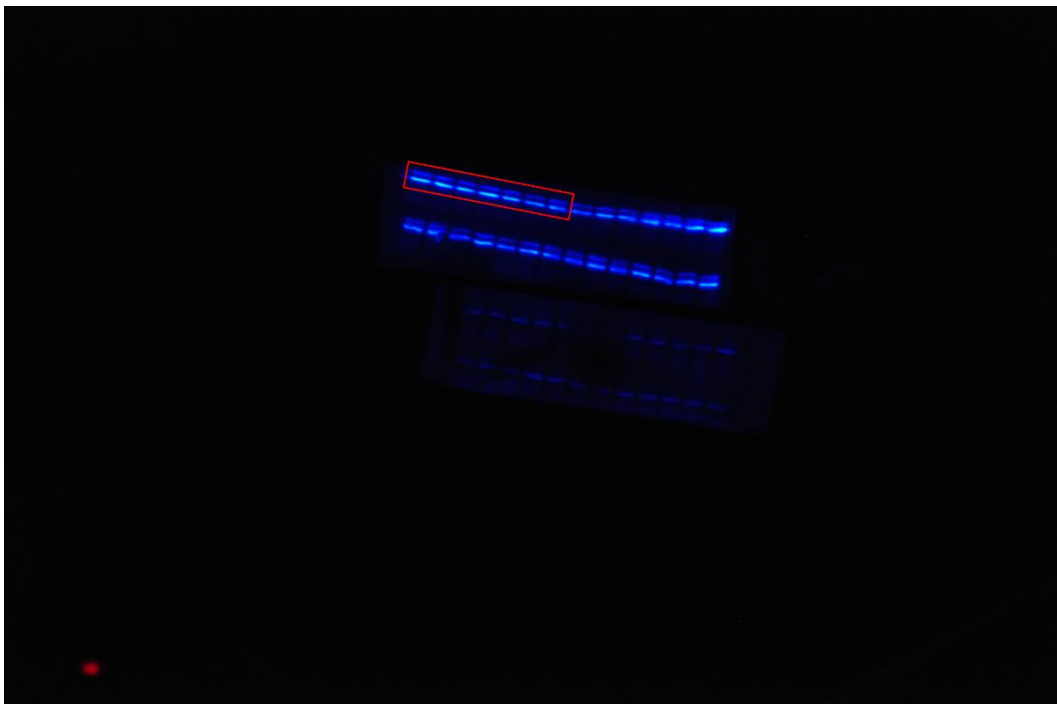

**Figure S5.** In the red box, from left to right, time course of E<sub>2</sub> (100 nM) treatment total ERK1/2 in AjGPER1-EGFP-expressing cells. Corresponding to Figure 5B in the manuscript.

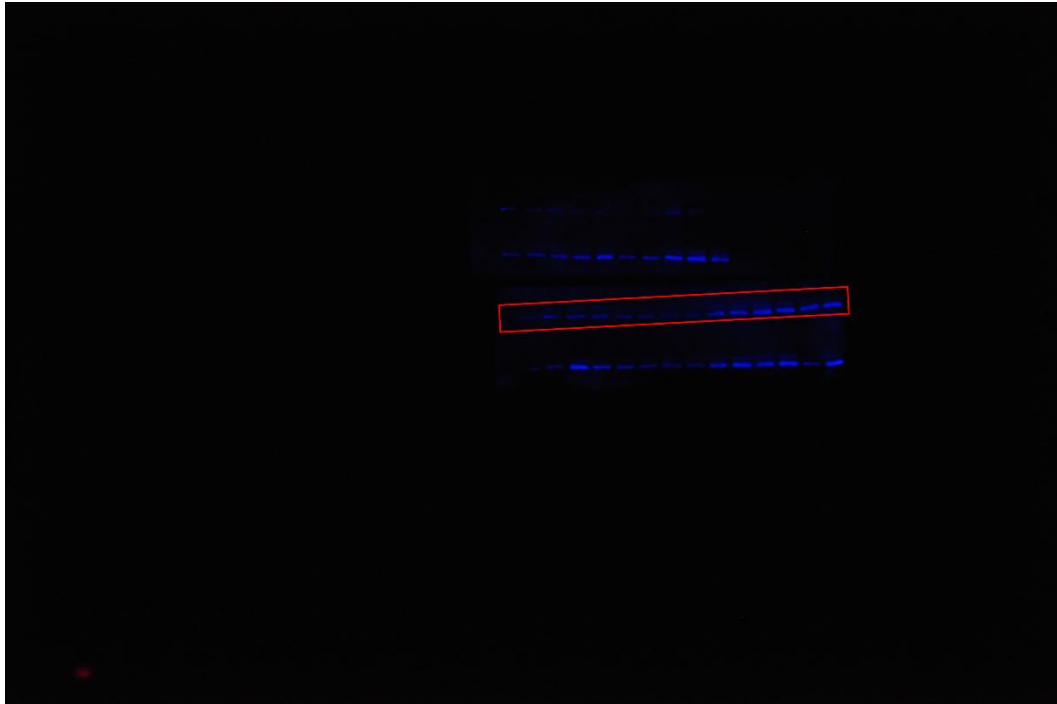

**Figure S6.** In the red box, from left to right, the phosphorylated ERK1/2 of Serum-starved AjGPER1-expressing cells were pretreated with PKA inhibitor (H89, 10  $\mu$ M), or DMSO, for 1 h before E<sub>2</sub> (100 nM) administration. Corresponding to Figure 6A and B in the manuscript.

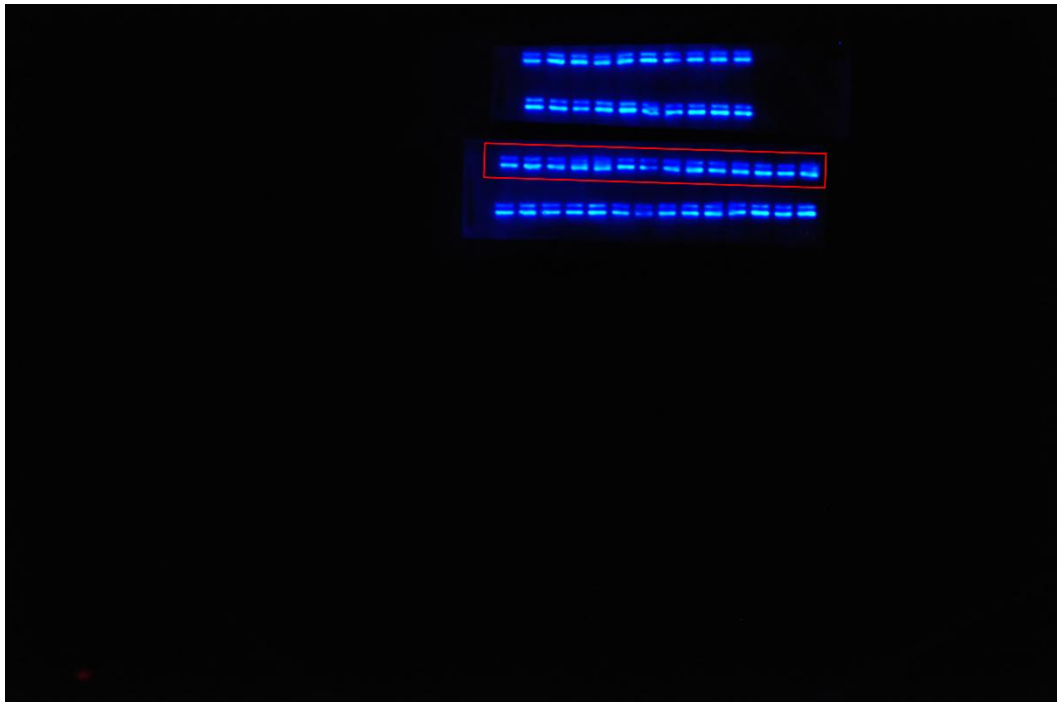

**Figure S7.** In the red box, from left to right, the total ERK1/2 of Serum-starved AjGPER1-expressing cells were pretreated with PKA inhibitor (H89, 10  $\mu$ M), or DMSO, for 1 h before E<sub>2</sub> (100 nM) administration. Corresponding to Figure 6 A and B in the manuscript.

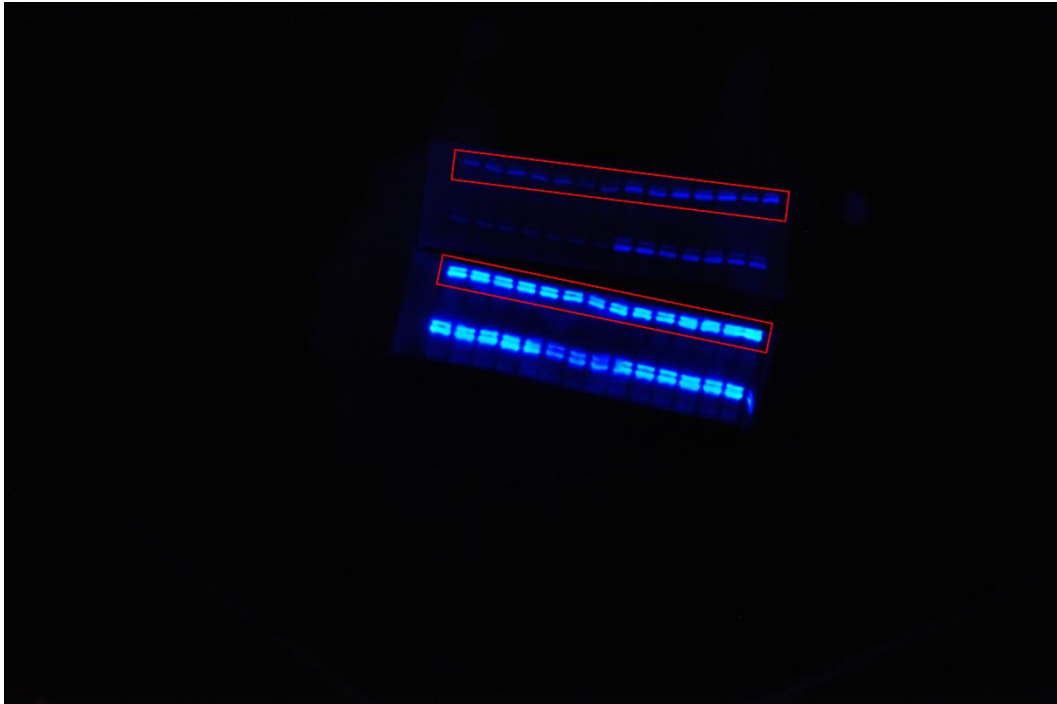

**Figure S8.** In the red box, from top to bottom, from left to right, the phosphorylated ERK1/2 and total ERK1/2 of Serum-starved AjGPER1-expressing cells were pretreated with PKC inhibitor (Go 6983, 1  $\mu$ M), or DMSO, for 1 h before E<sub>2</sub> (100 nM) administration. Corresponding to Figure 6C in the manuscript.

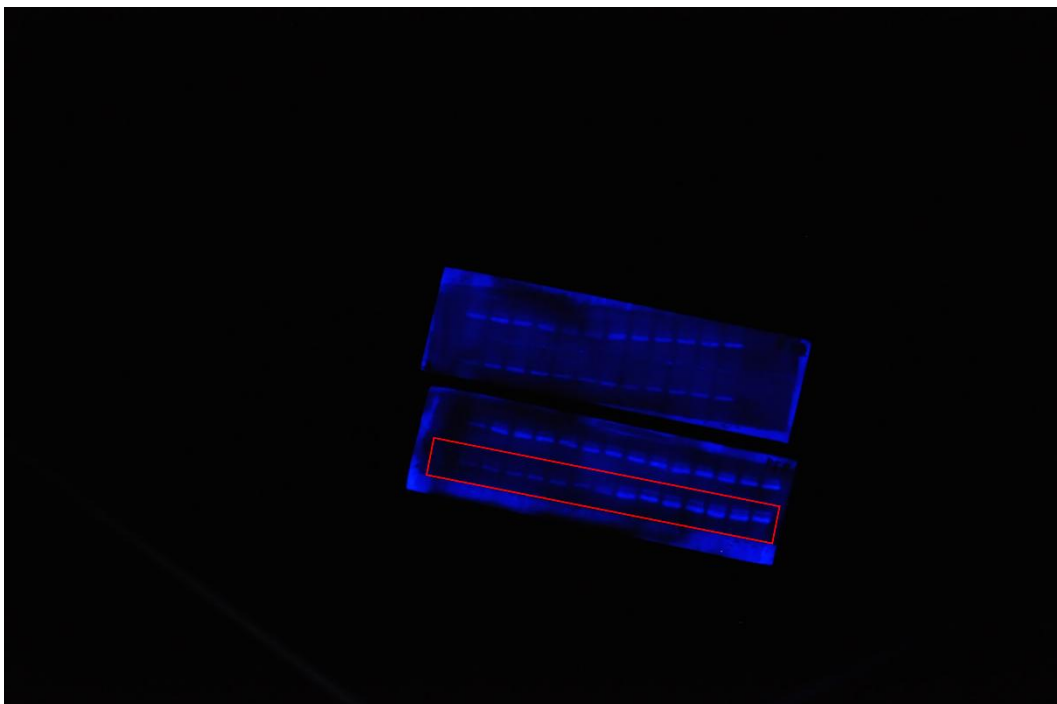

**Figure S9.** In the red box, from left to right, the phosphorylated ERK1/2 of Serum-starved AjGPER1-expressing cells were pretreated with G<sub>αq</sub> protein inhibitor (FR900359, 1  $\mu$ M), or DMSO, for 1 h before E<sub>2</sub> (100 nM) administration. Corresponding to Figure 6D in the manuscript.

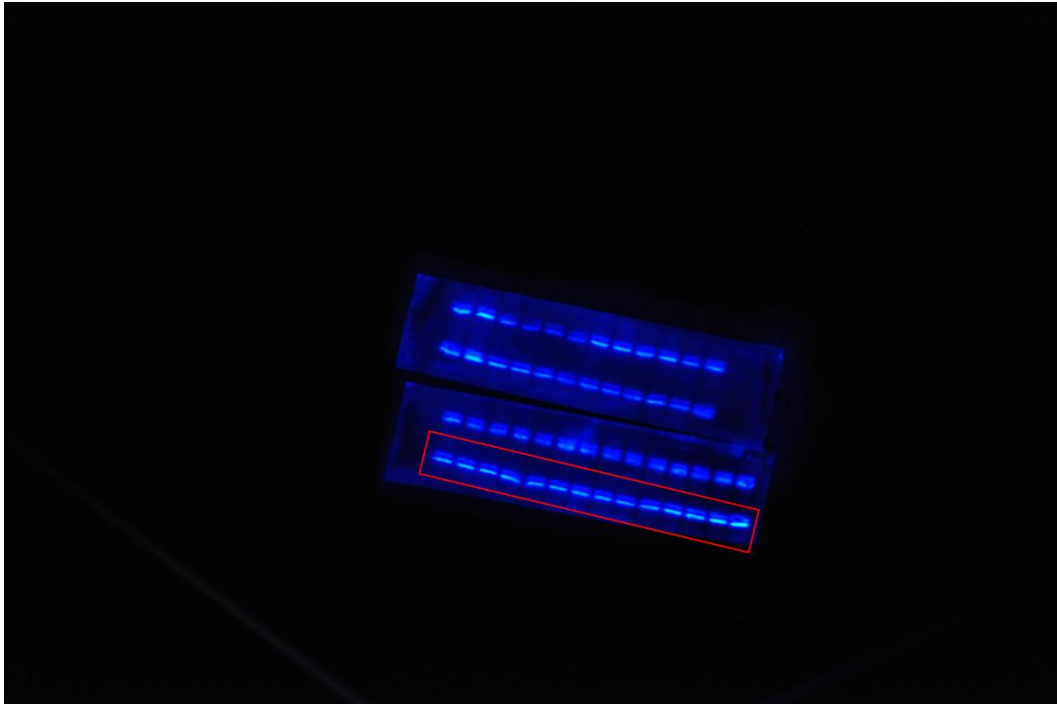

**Figure S10.** In the red box, from left to right, the total ERK1/2 of Serum-starved AjGPER1-expressing cells were pretreated with  $G_{\alpha q}$  protein inhibitor (FR900359, 1  $\mu$ M), or DMSO, for 1 h before  $E_2$  (100 nM) administration. Corresponding to Figure 6D in the manuscript.

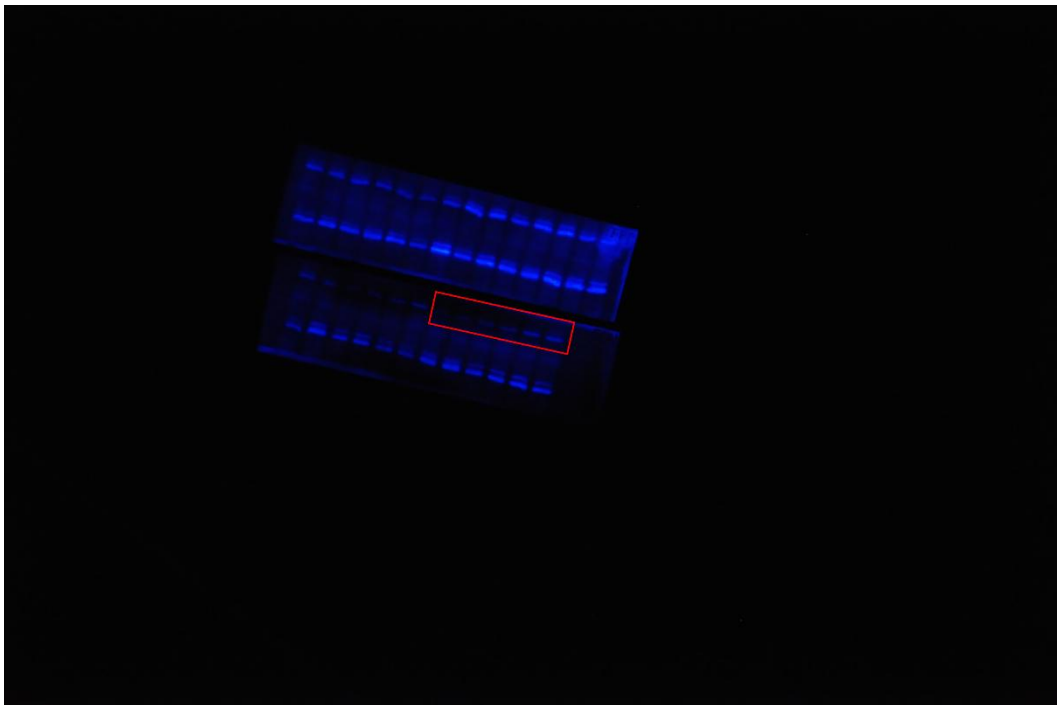

**Figure S11.** In the red box, from left to right, the phosphorylated ERK1/2 of blank (untransfected) cells, control (transfected with empty vector pEGFP-N1) cells, and AjGPER1-EGFP expressing cells treated with DMSO or BPA (100 nM) for 10 min, respectively. Corresponding to Figure 7A in the manuscript.

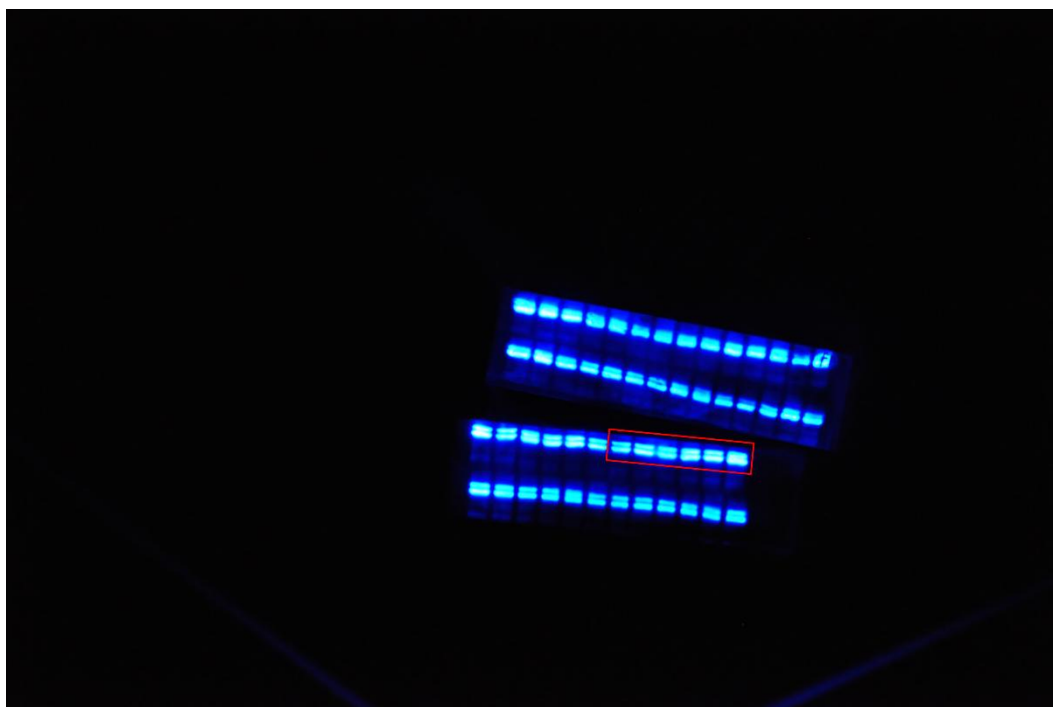

**Figure S12.** In the red box, from left to right, the total ERK1/2 of blank (untransfected) cells, control (transfected with empty vector pEGFP-N1) cells, and AjGPER1-EGFP expressing cells treated with DMSO or BPA (100 nM) for 10 min, respectively. Corresponding to Figure 7A in the manuscript.

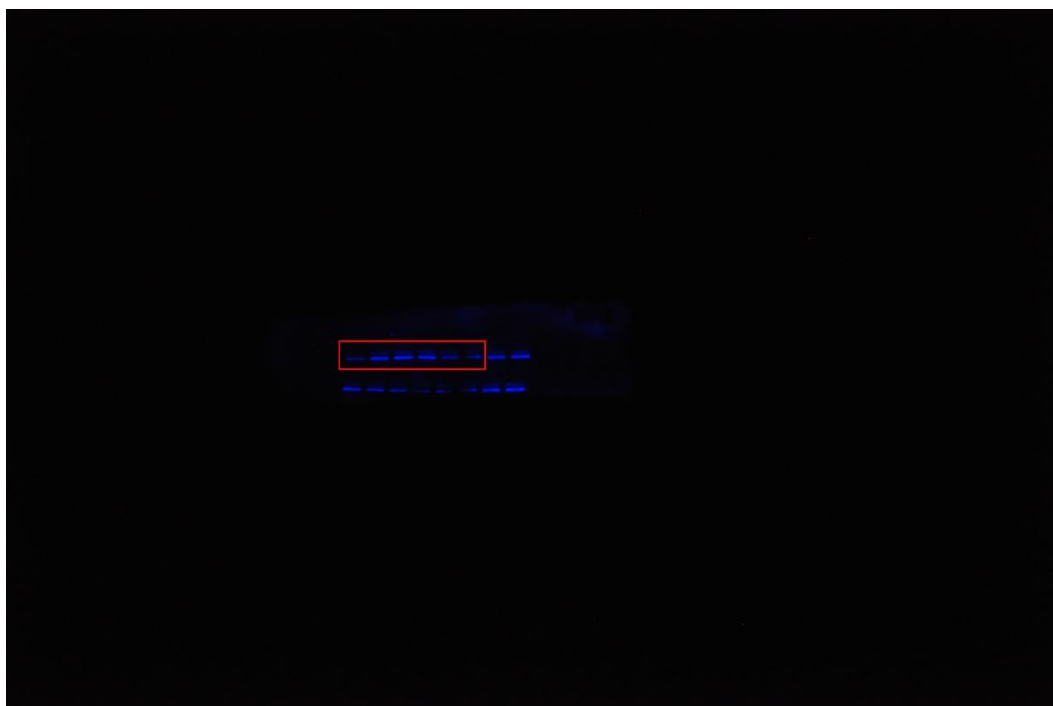

**Figure S13.** In the red box, from left to right, time course of BPA (100 nM) treatment induced ERK1/2 phosphorylation in AjGPER1-EGFP-expressing cells. Corresponding to Figure 7B in the manuscript.

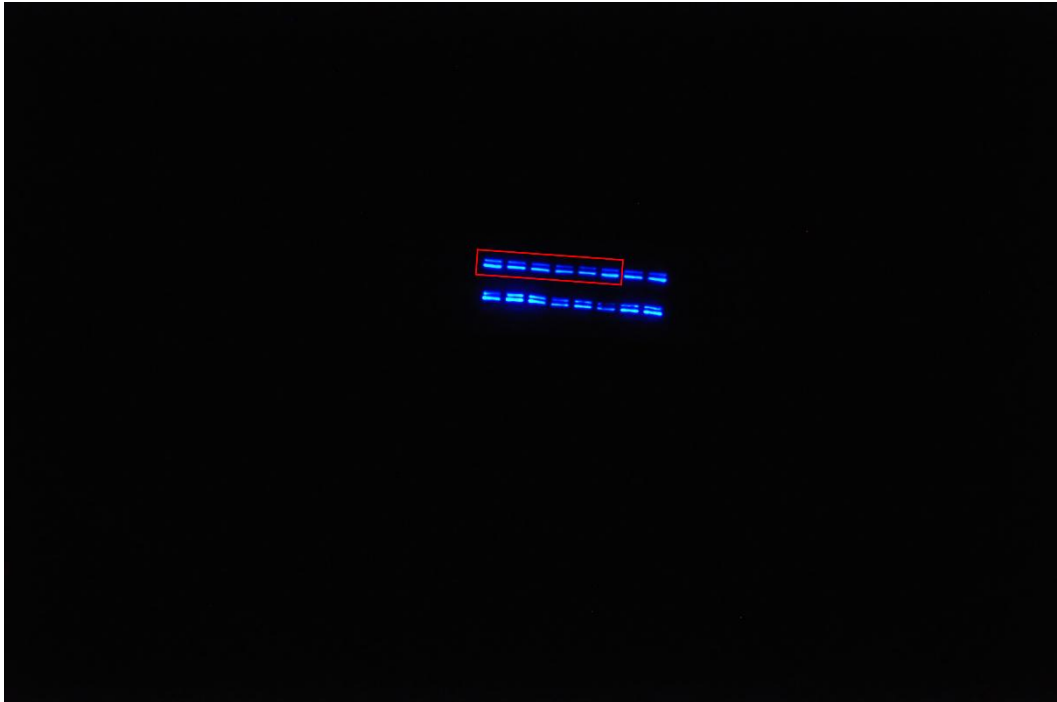

**Figure S14.** In the red box, from left to right, time course of BPA (100 nM) treatment total ERK1/2 in AjGPER1-EGFP-expressing cells. Corresponding to Figure 7B in the manuscript.

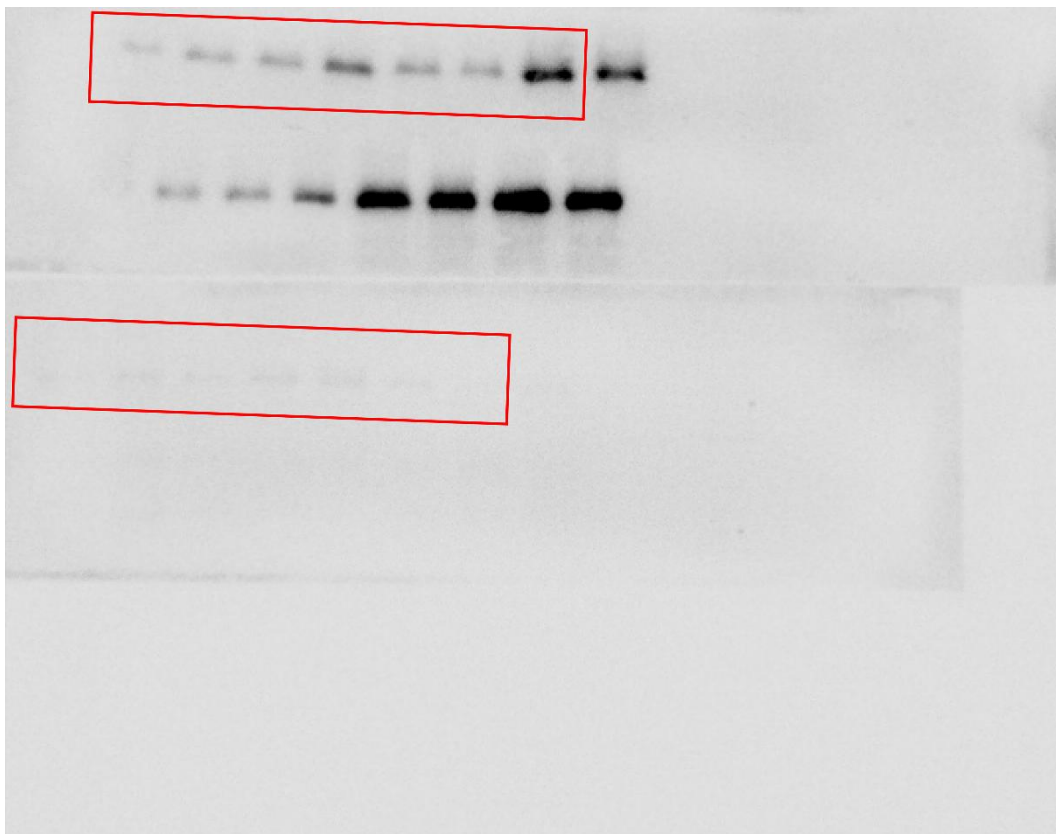

**Figure S15.** In the red box, from top to bottom, from left to right, the phosphorylated ERK1/2 in *A. japonicus* ovary and respiratory tree tissues activated by E<sub>2</sub> and BPA. Corresponding to Figure 8B in the manuscript.

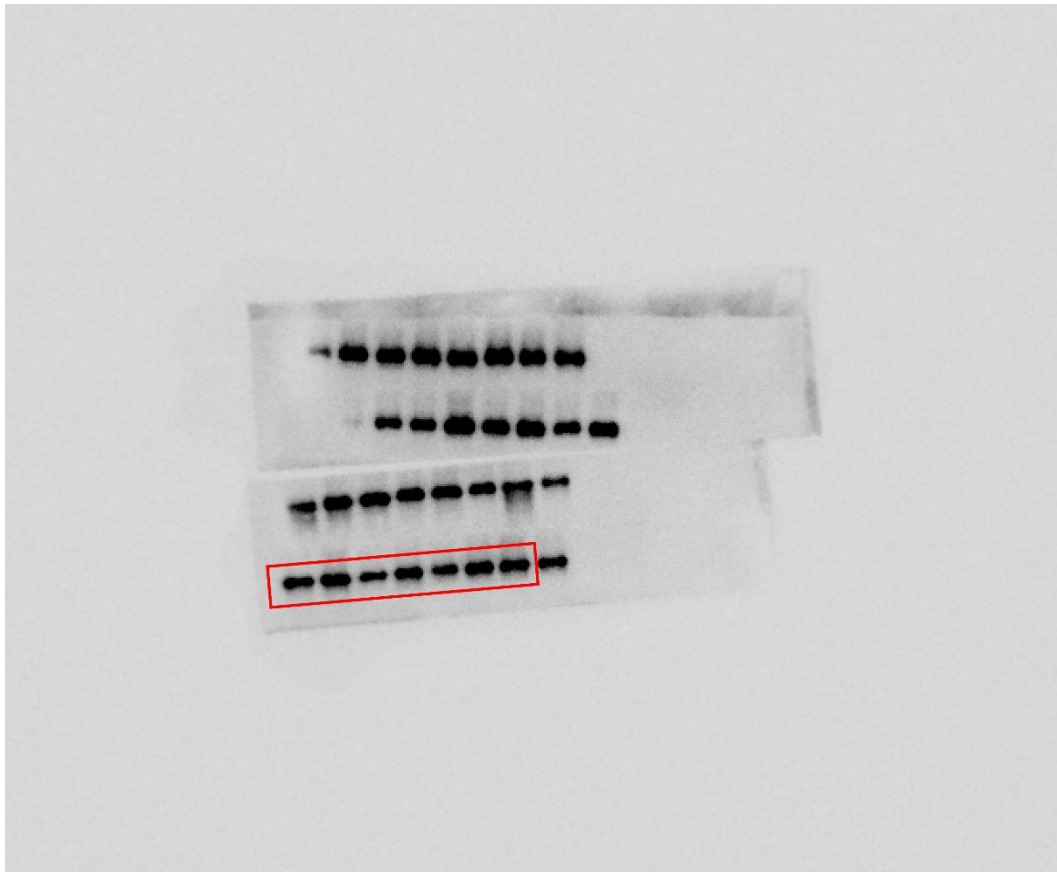

**Figure S16.** In the red box, from left to right, the total ERK1/2 in *A. japonicus* respiratory tree tissues. Corresponding to Figure 8B in the manuscript.

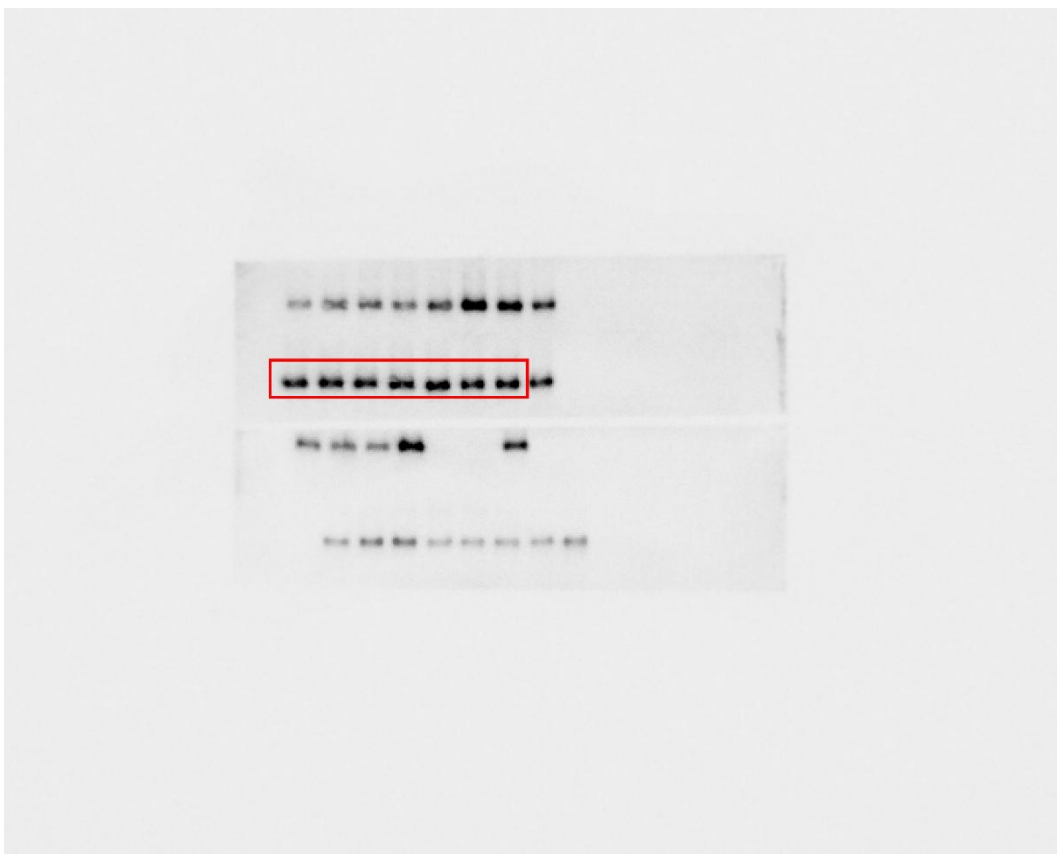



**Figure S17.** In the red box, from left to right, the total ERK1/2 in *A. japonicus* ovary.  
Corresponding to Figure 8B in the manuscript.
